# Supplementary material for: Comparative Phytochemical Analyses of Flowers from Primula veris subsp. veris Growing Wild and from Ex Situ Cultivation in Greece
Source: MDPI journal article supplement (doi:10.3390/foods12132623), 2023-07-06
Supplement: s1 [file s1]

## SUPPLEMENTARY FILE

# Comparative phytochemical analyses of flowers from *Primula veris* subsp. *veris* growing wild and from *ex situ* cultivation in Greece

Konstantia Graikou<sup>1</sup>, Anna Mpishinioti<sup>1</sup>, Nikolaos Tsafantakis<sup>1</sup>, Eleni Maloupa<sup>2</sup>, Katerina Grigoriadou<sup>2</sup> and Ioanna Chinou<sup>1,\*</sup>

<sup>1</sup> Laboratory of Pharmacognosy and Chemistry of Natural Products, Faculty of Pharmacy, National and Kapodistrian University of Athens, Panepistimiopolis, Zografou, 15771, Athens, Greece.

<sup>2</sup> Balkan Botanic Garden of Kroussia-Laboratory for the Conservation and Evaluation of Native and Floricultural Species, Institute of Plant Breeding and Genetic Resources, Hellenic Agricultural Organization-DIMITRA, Themi, P.O. Box 60458, GR-570 01 Thessaloniki, Greece.

\* Correspondence: ichinou@pharm.uoa.gr

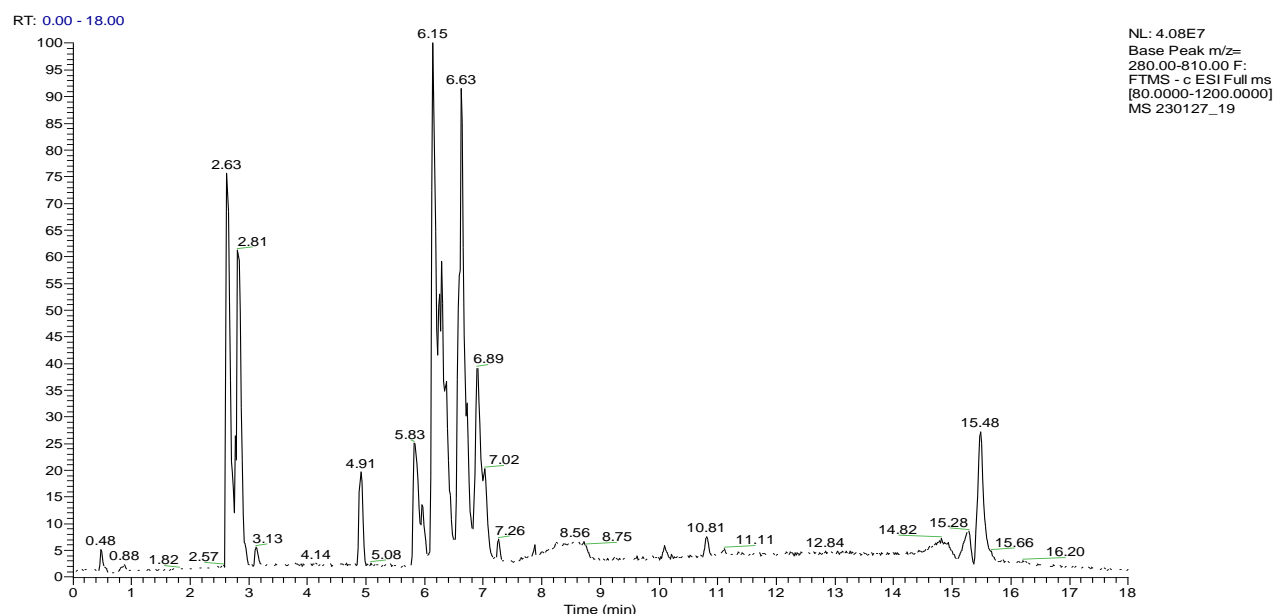

Figure S1. LC chromatogram of the wild *Primula veris* subsp. *veris* from Lake Prespa National Park by UHPLC-HRMS analysis

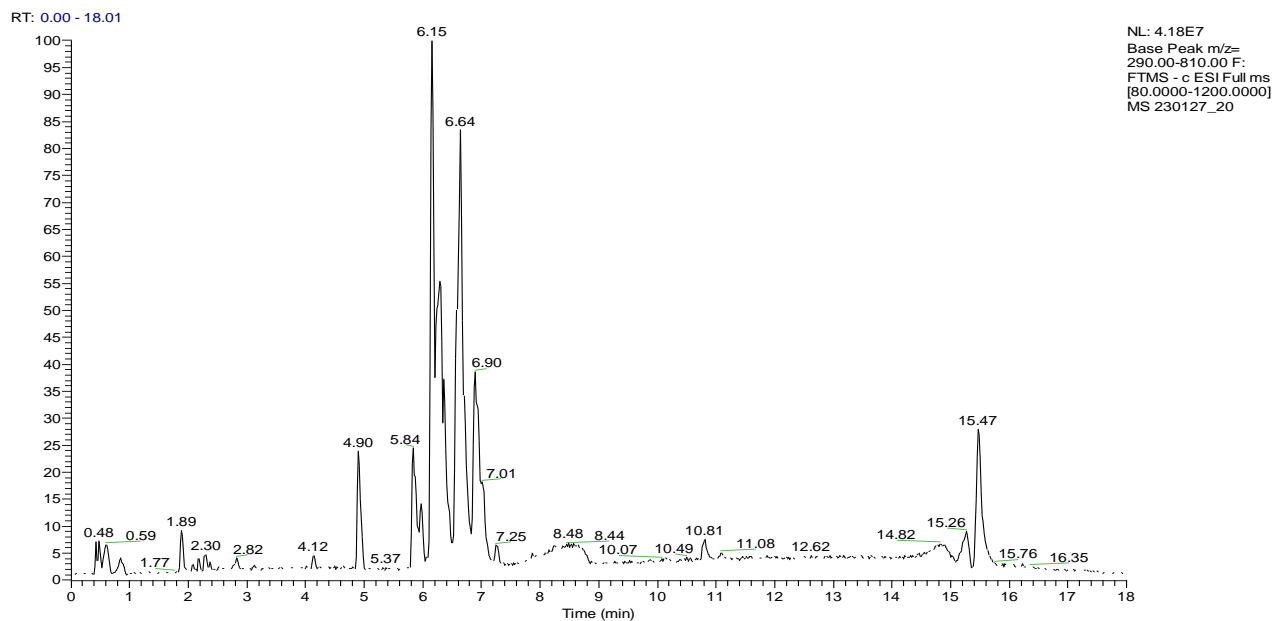

Figure S2. LC chromatogram of the *ex situ* cultivated *Primula veris* subsp. *veris* by UHPLC-HRMS analysis

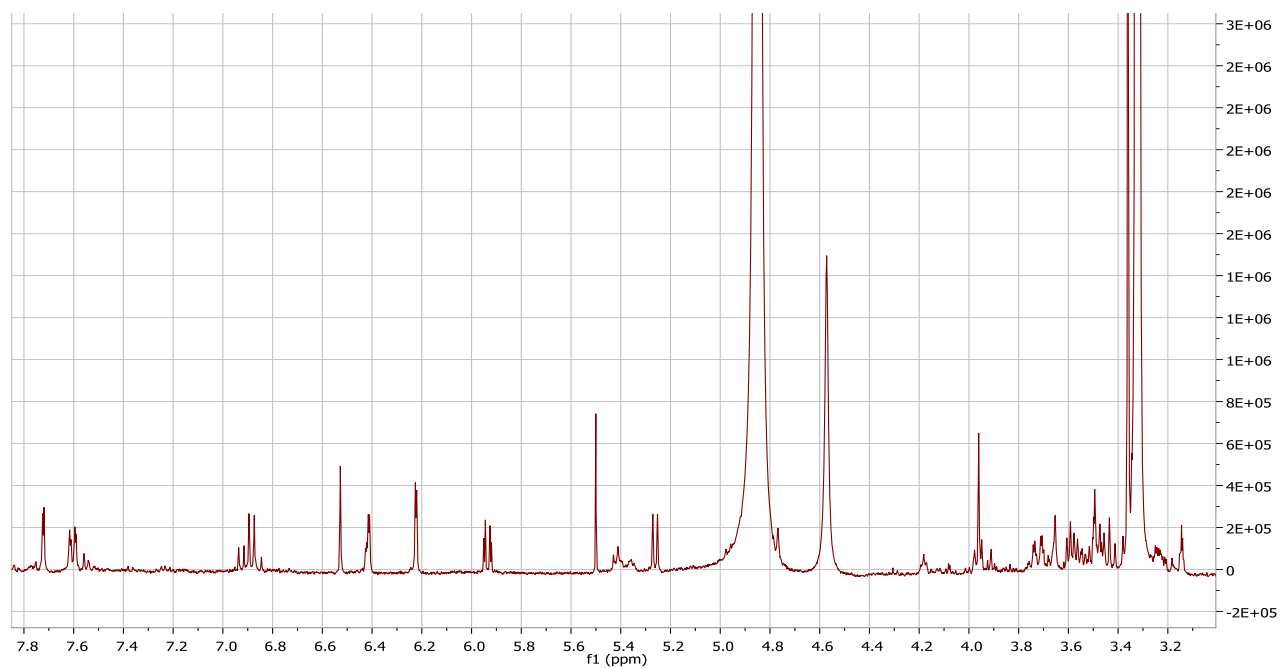

Figure S3. <sup>1</sup>H-NMR spectrum of compounds 1 and 2 (CD<sub>3</sub>OD, 400 MHz).

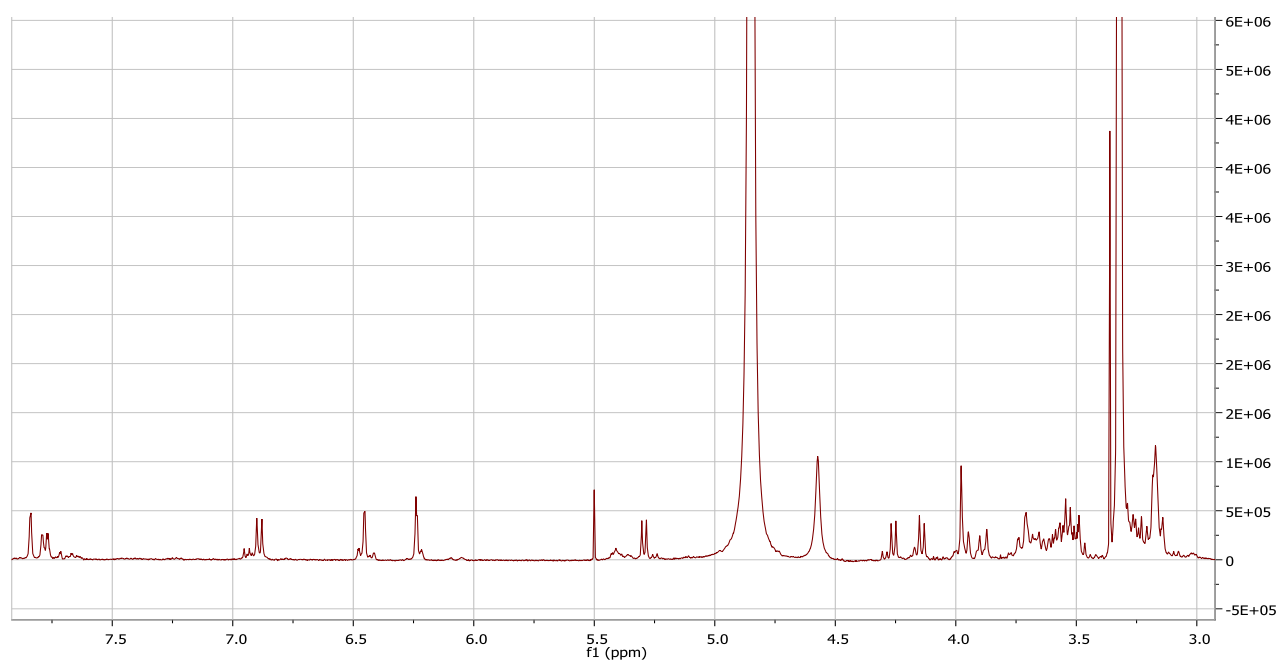

Figure S4. <sup>1</sup>H-NMR spectrum of compounds 3 and 4 (CD<sub>3</sub>OD, 400 MHz).

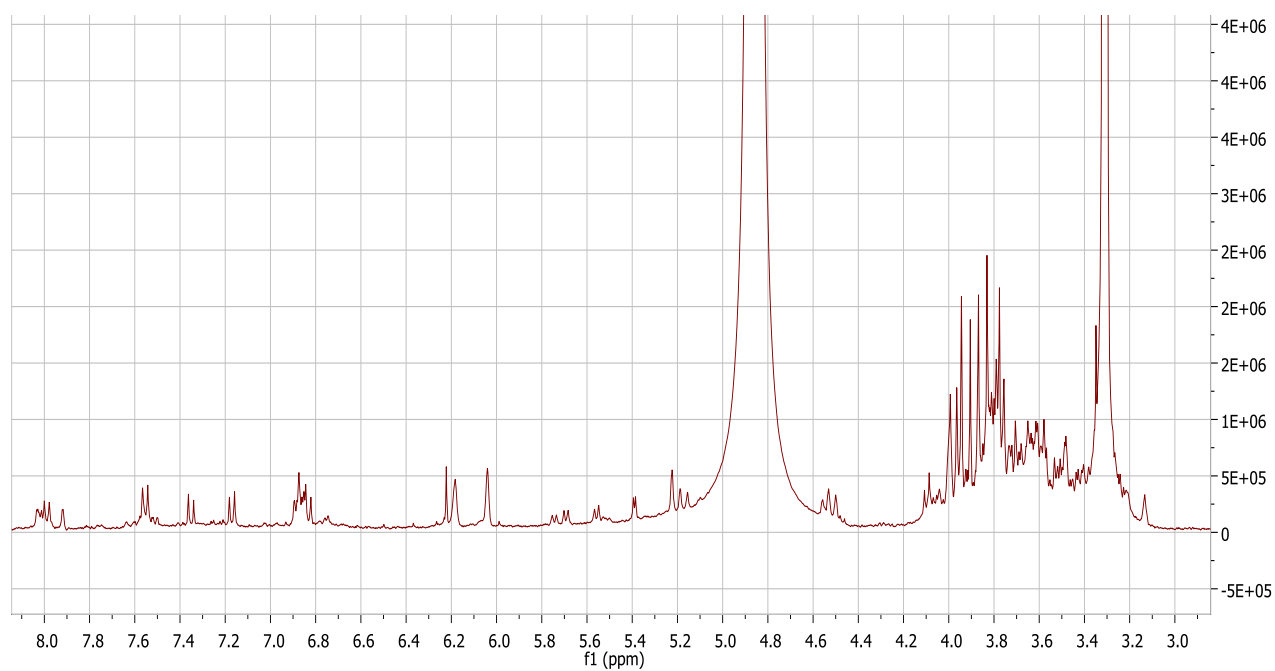

Figure S5. <sup>1</sup>H-NMR spectrum of compounds 5 and 6 (CD<sub>3</sub>OD, 400 MHz).

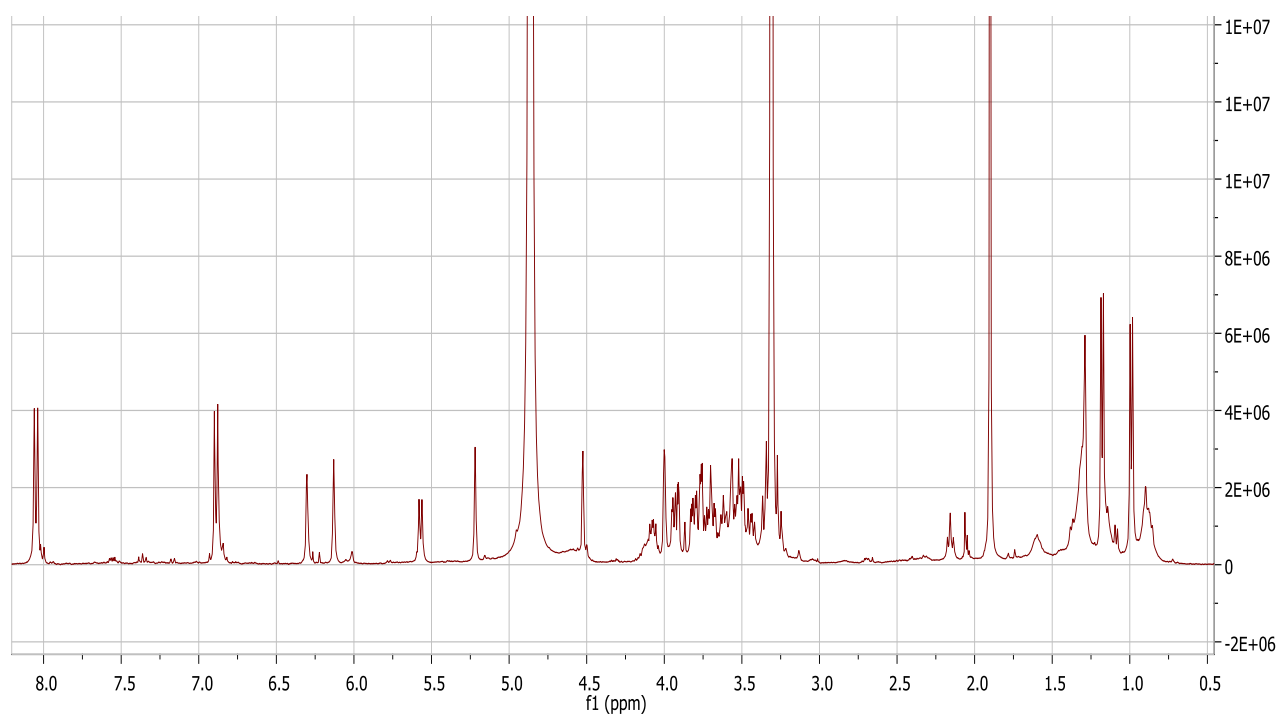

Figure S6. <sup>1</sup>H-NMR spectrum of compound 7 (CD<sub>3</sub>OD, 400 MHz).

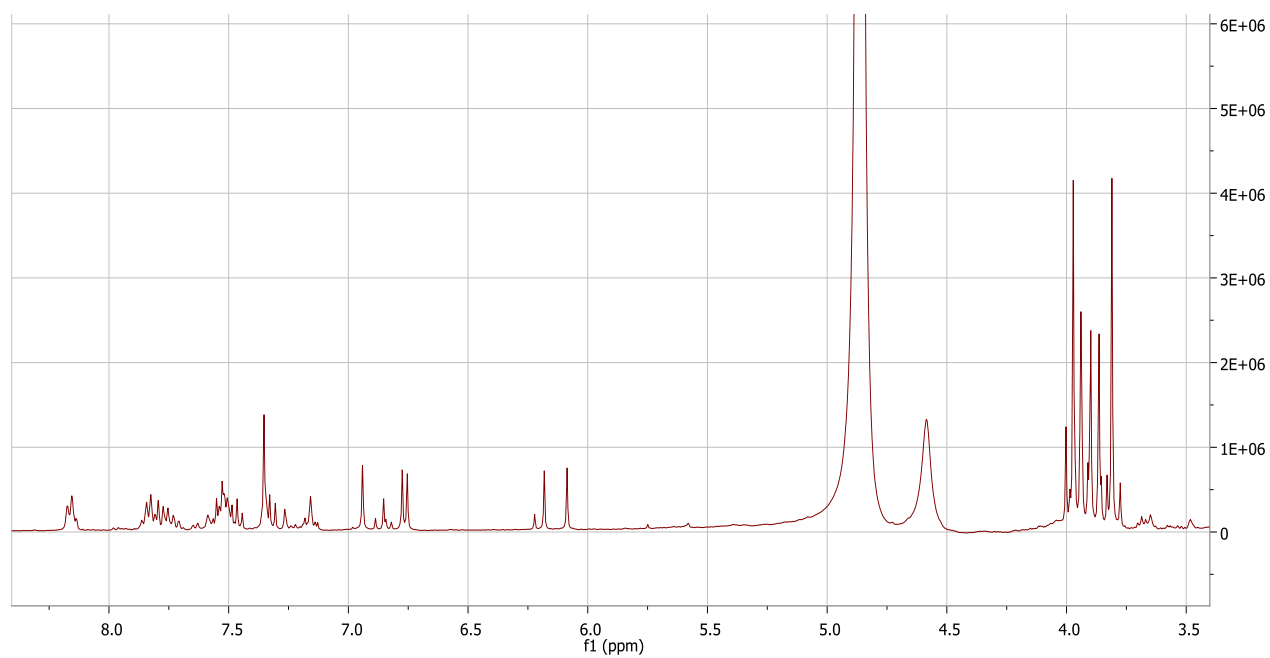

Figure S7. <sup>1</sup>H-NMR spectrum of compounds 7, 8 and 9 (CD<sub>3</sub>OD, 400 MHz).

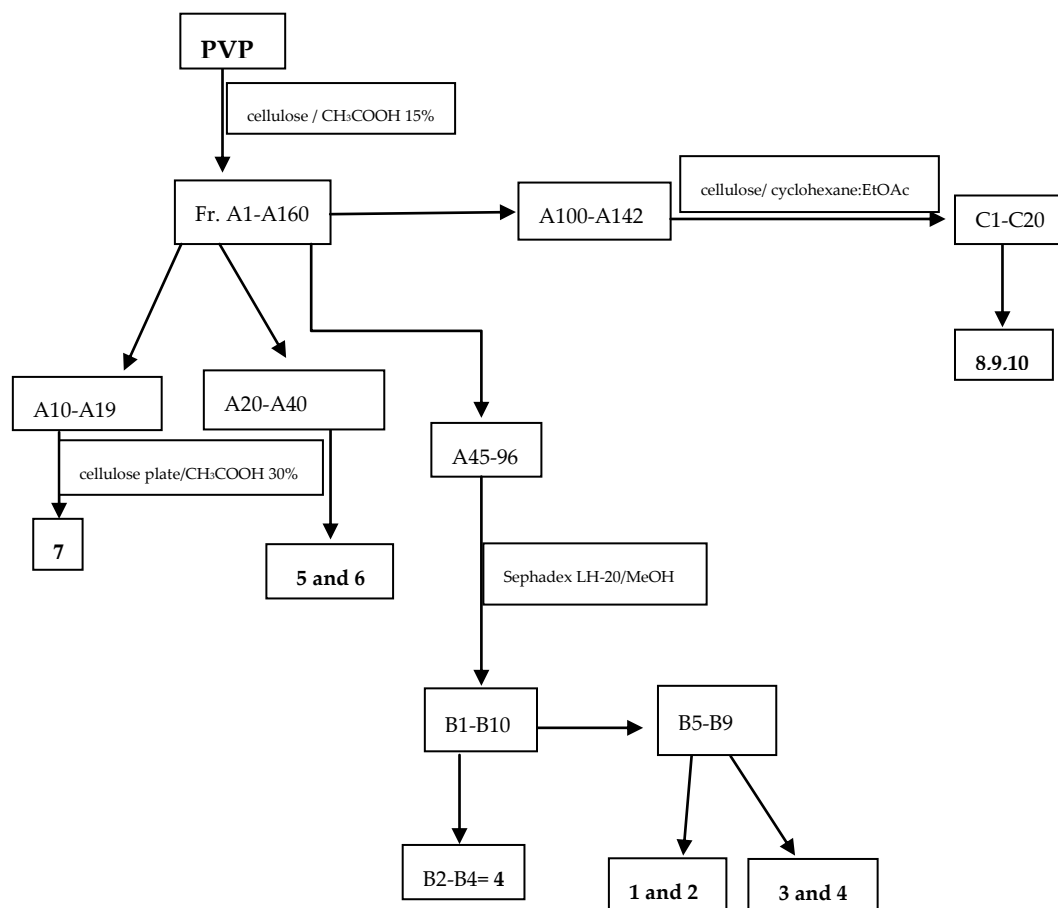

Figure S8. Fractionation and purification flow chart of the infusion of wild *Primula veris* subsp. *veris*
